# Supplementary material
Source: PubMed Central journal article supplement (PMC2649017)

*Supplemental Figures for*

Adipose tissue dysfunction tracks disease progression in two Huntington's disease mouse models

Jack Phan, Miriam A. Hickey, Peixiang Zhang, Marie-Francoise Chesselet, and Karen Reue

## SUPPLEMENTAL FIGURE LEGENDS

### **Fig. S1. Subcutaneous adipose tissue weight in R6/2 Tg and CAG140 KI mice.**

Subcutaneous adipose tissue weight as % body weight in female (A) R6/2 Tg and (B) CAG140 KI mice compared to corresponding wt mice at ages indicated (n = 5-6 mice of each genotype). \*,  $p < 0.05$  vs. corresponding wt mice.

**Fig. S2. Huntingtin mRNA is expressed in adipose tissue.** RNA was isolated from C57BL/6J mouse tissues indicated and Htt expression determined by RT-PCR (primers: GACCAAAGAAGGAACTCTCAG, ATGAAAGCTTTCAACAGAACC). Hdh mRNA was detected in all tissues assayed, including adipose tissue depots (brown adipose, gonadal white adipose, and retroperitoneal white adipose tissue). Levels of  $\beta 2$ -microglobulin are shown as a control (primers: CAGCATGGCTCGCTCGGTGAC, CGTAGCAGTTCAGTATGTTCG).

**Fig. S1**

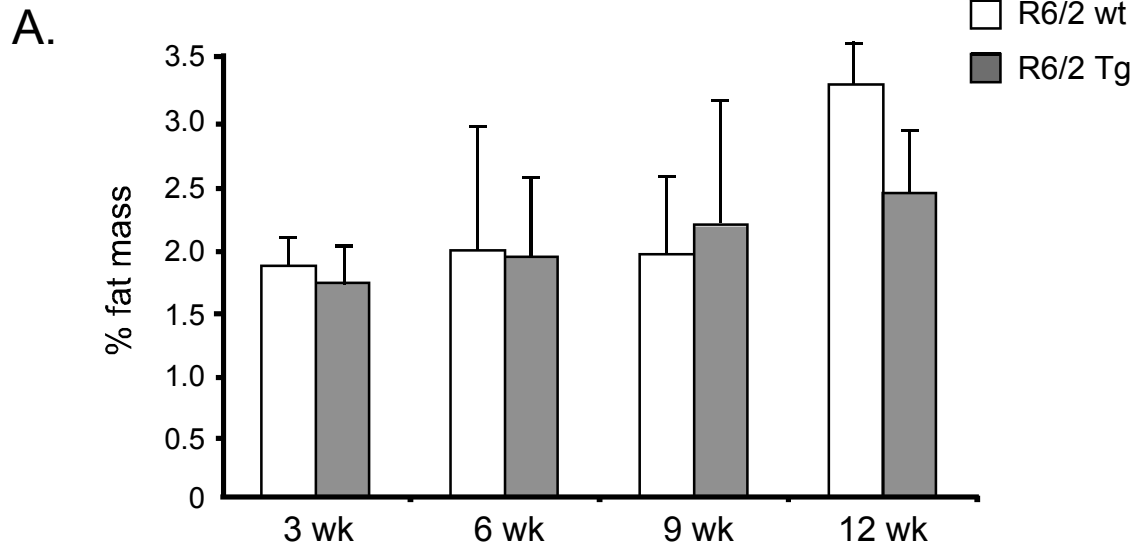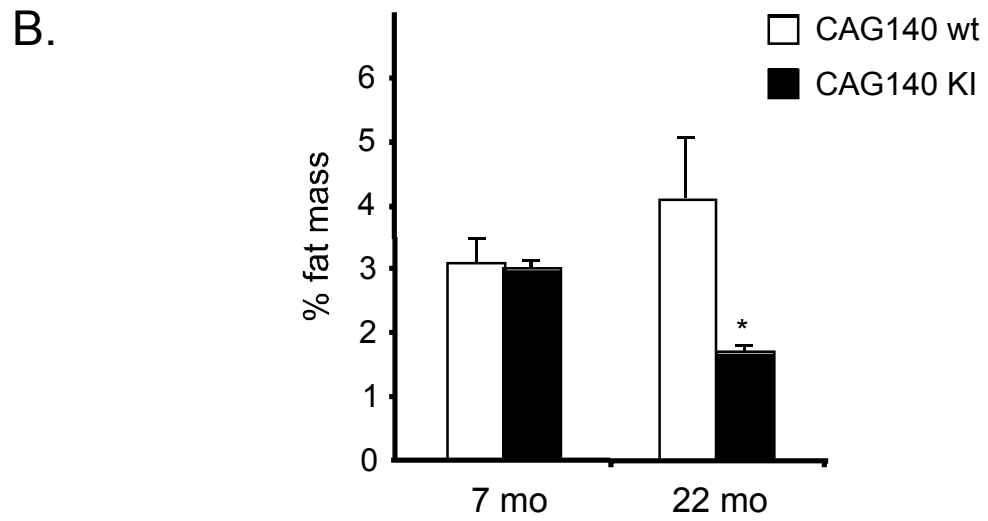

**Fig. S2**

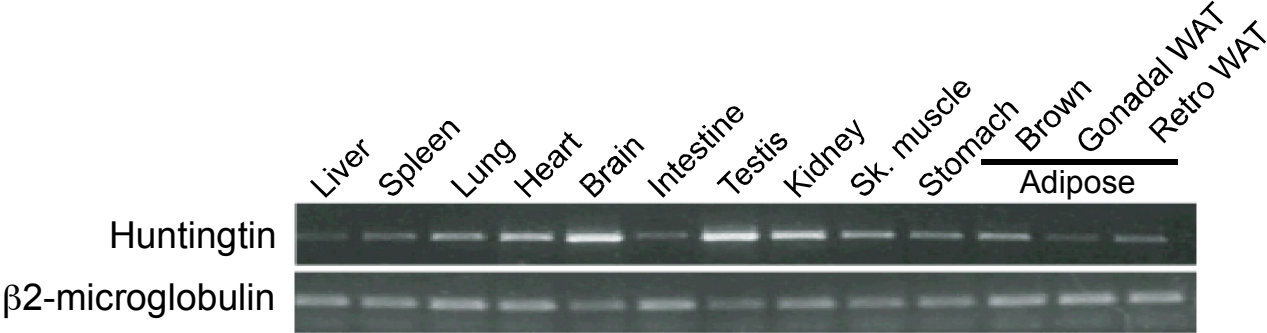

Supplement: ddn428_1.pdf [file ddn428_1.pdf]
